# Supplementary material
Source: MDPI journal article supplement (https://www.mdpi.com/1996-1073/13/21/5795)
Supplement: s1 [file s1]

Supplementary Materials for

# Smart Energy in a Smart City: Utopia or Reality? Evidence from Poland

Aleksandra Lewandowska \*, Justyna Chodkowska-Miszczuk, Krzysztof Rogatka and Tomasz Starczewski

Department of Urban and Regional Development Studies, Faculty of Earth Sciences and Spatial Management, Nicolaus Copernicus University, 87-100 Toruń, Poland; jchodkow@umk.pl (J.C.-M.); krogatka@umk.pl (K.R.); tomaszstarczewski1@wp.pl (T.S.)

\* Correspondence: amal@umk.pl; Tel.: +48-56-611-2633

**Table S1.** RES in city development documents.

| City    | Planned RES Activities and Investments Included in Low-Emission Economy Plan                                                                                                                                                                                                                                                             | Placement of RES in the City's Development Strategy                                                                                                                                                                                                                                                                            |
|---------|------------------------------------------------------------------------------------------------------------------------------------------------------------------------------------------------------------------------------------------------------------------------------------------------------------------------------------------|--------------------------------------------------------------------------------------------------------------------------------------------------------------------------------------------------------------------------------------------------------------------------------------------------------------------------------|
| Warsaw  | <ul style="list-style-type: none"> <li>• Construction or modification of electricity- and heat-generation plants for high-efficiency co-generation from RES;</li> <li>• construction of, or modification towards, intelligent medium- and low-voltage distribution grids dedicated to increasing renewable energy generation.</li> </ul> | <p><b>Goal:</b> We live in a clean natural environment</p> <p><b>Action:</b> Popularising RES and energy-efficient solutions.</p>                                                                                                                                                                                              |
| Kraków  | <ul style="list-style-type: none"> <li>• Green purchases for Town Hall;</li> <li>• installation of PV on bus roofs.</li> </ul>                                                                                                                                                                                                           | <p><b>Goal:</b> Sustainable environment</p> <p><b>Strategic projects:</b> Improving the energy efficiency of public buildings.</p>                                                                                                                                                                                             |
| Łódź    | <ul style="list-style-type: none"> <li>• Purchase and installation of photovoltaic panels on selected buildings;</li> <li>• construction of a reinforced-concrete passive office building and installation of photovoltaic panels.</li> </ul>                                                                                            | <p><b>Goal:</b> A green, tidy Łódź</p> <p><b>Action:</b> Optimising energy expenditure through thermal modernisation of municipal facilities, including eliminating low-emission sources and implementing intelligent municipal management systems</p>                                                                         |
| Wrocław | <ul style="list-style-type: none"> <li>• Implementing comprehensive pro-consumer programmes to increase the share of RES in the energy balance and reduce "chimney" emissions.</li> </ul>                                                                                                                                                | <p><b>Goal:</b> A smart city: Increasing energy efficiency and using renewable energy sources</p> <p><b>Action:</b> Investments in renewable energy on public building roofs.</p> <p><b>Goal:</b> An inspirational city</p> <p><b>Action:</b> Let's promote and creatively use knowledge about rational energy management.</p> |
| Poznań  | <ul style="list-style-type: none"> <li>• Constructing and modernizing installations for the distribution of energy and heat from RES;</li> <li>• constructing a DG micro power plant with a total capacity of up to 0.3 MWp;</li> <li>• average annual electricity production efficiency projected to be approx. 11%.</li> </ul>         | <p><b>Goal:</b> A green, mobile city</p> <p><b>Actions:</b> Introducing modern, energy-saving technologies and solutions in public spaces and buildings, including implementing smart solutions for greater use of renewable energy</p>                                                                                        |
| Gdańsk  | <ul style="list-style-type: none"> <li>• Supporting and promoting investments that use RES and alternative fuels;</li> <li>• managing projects for co-financing energy-efficiency activities and the use of</li> </ul>                                                                                                                   | <p><b>Goal:</b> Economy and transport:</p> <p><b>Action:</b> Ensuring the city and metropolis's improvement in energy efficiency and energy security, and the reduction of greenhouse gas emissions.</p>                                                                                                                       |

|             |                                                                                                                                                                                                                                                                                                                          |                                                                                                                                                                                                                                                                                                                                                                            |
|-------------|--------------------------------------------------------------------------------------------------------------------------------------------------------------------------------------------------------------------------------------------------------------------------------------------------------------------------|----------------------------------------------------------------------------------------------------------------------------------------------------------------------------------------------------------------------------------------------------------------------------------------------------------------------------------------------------------------------------|
|             | RES in the City of Gdańsk under available support programmes .                                                                                                                                                                                                                                                           |                                                                                                                                                                                                                                                                                                                                                                            |
| Szczecin    | <ul style="list-style-type: none"> <li>Adapting the system for generating, managing and distributing RES energy.</li> </ul>                                                                                                                                                                                              | Very general statements about greater energy security                                                                                                                                                                                                                                                                                                                      |
| Bydgoszcz   | <ul style="list-style-type: none"> <li>Replacing conventional lighting with PV-powered lighting in sports facilities</li> </ul>                                                                                                                                                                                          | <b>Goal:</b> Sustainable management of environmental resources; the municipal economy is conducted according to sustainable development principles; Sustainable energy action plan for the city of Bydgoszcz 2012–2020                                                                                                                                                     |
| Lublin      | <ul style="list-style-type: none"> <li>Installing two gas engines in the heat and power plant of a sewage treatment plant in order to increase the possibilities of of biogas for energy production;</li> <li>constructing solar collectors for heating domestic hot water</li> </ul>                                    | <b>Goal:</b> A friendly Lublin<br><b>Actions:</b> Support development of urban DGs (wind turbines, PV, etc.)<br><b>Goal:</b> Entrepreneurship<br><b>Actions:</b> Development of industrial sector: the region’s environmental conditions and the scientific/research potential of Lublin universities are conducive to building a strong renewable energy source in Lublin |
| Białystok   | <ul style="list-style-type: none"> <li>Improving energy efficiency and the use of renewable energy sources, or reducing pollutant emissions in single-family buildings;</li> <li>improving energy efficiency and the use of renewable energy sources, or reducing pollutant emissions in municipal buildings.</li> </ul> | No mention of RES in strategy objectives<br><b>Actions:</b> Implementing new technologies in the economy to increase environmental safety and eliminate threats to the environment, developing energy-saving technologies, increasing use of renewable energy.                                                                                                             |
| Katowice    | <ul style="list-style-type: none"> <li>Installing solar collectors supporting the domestic hot water system and installing a high-efficiency co-generation system, alongside adapting a unit to recover heat from flue gas from the thermal neutralisation of waste in municipal facilities.</li> </ul>                  | <b>Goal:</b> Quality of life<br>Just a general statement that an energy refurbishment of the city is planned                                                                                                                                                                                                                                                               |
| Gdynia      | <ul style="list-style-type: none"> <li>Construction of PV installations on parking shelters at a trolleybus depot; modernisation of the old heat source;</li> <li>introducing recommendations on energy efficiency in updated and new documents.</li> </ul>                                                              | <b>Goal:</b> A healthy and safe environment in Gdynia<br><b>Action:</b> Promoting and supporting the use of pro-ecological technological solutions for domestic heating and RES energy production.                                                                                                                                                                         |
| Częstochowa | <ul style="list-style-type: none"> <li>No information.</li> </ul>                                                                                                                                                                                                                                                        | <b>Goal:</b> Improving the city’s energy efficiency<br><b>Actions:</b> Establishing, in cooperation with universities, a centre for promoting energy efficiency and the use of RES (technology transfer and management solutions).<br>Sustainable energy action plan (SEAP) for the city of Częstochowa.                                                                   |
| Radom       | <ul style="list-style-type: none"> <li>Use of RES or reduction of pollutant emissions in municipal facilities;</li> <li>construction of PV.</li> </ul>                                                                                                                                                                   | <b>Goal:</b> Supporting pro-ecological initiatives that improve environmental quality and ecological safety<br><b>Action:</b> Increasing the use of energy from renewable sources                                                                                                                                                                                          |
| Toruń       | <ul style="list-style-type: none"> <li>Construction of RES installations of various types (PV, biogas plants, wind farms) within the city.</li> </ul>                                                                                                                                                                    | <b>Goal:</b> Further improvement to the city’s natural environment                                                                                                                                                                                                                                                                                                         |

|           |                                                                                                                                                                                     |                                                                                                                                                                                                                                                                                                                                                                                                                                                      |
|-----------|-------------------------------------------------------------------------------------------------------------------------------------------------------------------------------------|------------------------------------------------------------------------------------------------------------------------------------------------------------------------------------------------------------------------------------------------------------------------------------------------------------------------------------------------------------------------------------------------------------------------------------------------------|
|           |                                                                                                                                                                                     | <b>Actions:</b> Diversification of energy sources, including the using RES and increasing broadly understood energy efficiency.                                                                                                                                                                                                                                                                                                                      |
| Sosnowiec | <ul style="list-style-type: none"> <li>Introducing the rational use of RES for street lighting.</li> </ul>                                                                          | <b>Goal:</b> Actions to improve air quality<br><b>Actions:</b> Supporting the use of local RES and assistance in introducing environmentally friendly energy carriers.                                                                                                                                                                                                                                                                               |
| Rzeszów   | <ul style="list-style-type: none"> <li>Increasing the share of RES in total energy consumption by implementing PV installations for public buildings.</li> </ul>                    | <b>Goal:</b> Use of resources – clean energy and a rich heritage of activities<br><b>Action:</b> Increasing the share of RES energy in ROF [Rzeszowski Obszar Funkcjonalny], incl. by implementing PV in public buildings.                                                                                                                                                                                                                           |
| Kielce    | <ul style="list-style-type: none"> <li>Installing solar collectors for hot water and PV for electricity.</li> </ul>                                                                 | <b>Goal:</b> A green, clean Kielce<br><b>Action:</b> The need to constantly improve the quality of the environment and the energy efficiency of buildings and infrastructure.                                                                                                                                                                                                                                                                        |
| Gliwice   | <ul style="list-style-type: none"> <li>Zero emission from the suburbs – modernising of single-family buildings using ground heat pumps combined with thermal insulation.</li> </ul> | <b>Goal:</b> Building responsibility for one's own life in private and professional dimensions<br><b>Actions:</b> Activities aimed at energy saving.                                                                                                                                                                                                                                                                                                 |
| Zabrze    | <ul style="list-style-type: none"> <li>Modernising existing heating systems, using RES in the city of Zabrze.</li> </ul>                                                            | <b>Goal:</b> Environmental protection and adaptation of the city to the requirements of climate change.<br><b>Action:</b> Energy efficiency; implementing projects resulting from the Low-Emission Reduction Programme (replacing heat sources in individual buildings, thermal insulation, RES) and the Low-Emission Economy Plan (reducing greenhouse gas emissions, increasing renewable energy sources and energy saving, improving air quality) |
